# Supplementary material for: Placental histology and neutrophil extracellular traps in lupus and pre-eclampsia pregnancies
Source: PubMed Central journal article supplement — Lupus Sci Med. 2016 Apr 27;3(1):e000134. doi: 10.1136/lupus-2015-000134 (PMC4854113; doi:10.1136/lupus-2015-000134), 2016-04-27
Supplement: lupus-2015-000134supp.pdf [file lupus-2015-000134supp.pdf]

## **Appendix I.**

ICD-9 codes from discharge records were queried for the following key words: "preeclampsia" (642.50-54); "systemic lupus erythematosus" (695.4, 710.0); "pregnancy" (650, V30.00, V30.01, V39.00-01, 669.70-71), which includes both vaginal and Cesarean deliveries. Pregnancies complicated by preexisting or gestational hypertension and diabetes were identified using discharge ICD-9 codes of 642.20; 642.70-74 and 648.00 respectively, and excluded from the study.

Table 1 (supplementary). Histopathologic Observations

| Variables                                                           | Normal<br>(N=10) | Preeclampsia<br>(N=11) | SLE<br>(N=10) | SLE+Preeclampsia<br>(N=4) |
|---------------------------------------------------------------------|------------------|------------------------|---------------|---------------------------|
| <b>Inflammation</b>                                                 |                  |                        |               |                           |
| <b>Chronic maternal</b>                                             |                  |                        |               |                           |
| Absent                                                              | 10 (100%)        | 9 (82%)                | 9 (90%)       | 3 (75%)                   |
| Mild                                                                | 0                | 2 (18%)                | 0             | 0                         |
| Moderate                                                            | 0                | 0                      | 0             | 1 (25%)                   |
| Severe                                                              | 0                | 0                      | 0             | 0                         |
| Missing                                                             | n/a              | n/a                    | 1 (10%)       | n/a                       |
| <b>Acute maternal</b>                                               |                  |                        |               |                           |
| Absent                                                              | 10 (100%)        | 8 (73%)                | 8 (80%)       | 2 (50%)                   |
| Mild                                                                | 0                | 3 (27%)                | 0             | 0                         |
| Moderate                                                            | 0                | 0                      | 1 (10%)       | 2 (50%)                   |
| Severe                                                              | 0                | 0                      | 0             | 0                         |
| Missing                                                             | n/a              | n/a                    | 1 (10%)       | n/a                       |
| <b>Fetal chronic</b>                                                |                  |                        |               |                           |
| Absent                                                              | 9 (90%)          | 9 (82%)                | 9 (90%)       | 3 (75%)                   |
| Mild                                                                | 1 (10%)          | 1 (9%)                 | 0             | 0                         |
| Moderate                                                            | 0                | 1 (9%)                 | 0             | 1 (25%)                   |
| Severe                                                              | 0                | 0                      | 0             | 0                         |
| Missing                                                             | n/a              | n/a                    | 1 (10%)       | n/a                       |
| <b>Fetal acute</b>                                                  |                  |                        |               |                           |
| Absent                                                              | 10 (100%)        | 11 (100%)              | 9 (90%)       | 3 (75%)                   |
| Mild                                                                | 0                | 0                      | 0             | 0                         |
| Moderate                                                            | 0                | 0                      | 0             | 1 (25%)                   |
| Severe                                                              | 0                | 0                      | 0             | 0                         |
| Missing                                                             | n/a              | n/a                    | 1 (10%)       | n/a                       |
| <b>Decidual Vasculopathy, thrombosis, fetal-Maternal Hemorrhage</b> |                  |                        |               |                           |
| <b>Perivasculitis; mild</b>                                         |                  |                        |               |                           |
| Not-present                                                         | 9 (90%)          | 7 (64%)                | 8 (80%)       | 3 (75%)                   |
| Present                                                             | 1 (10%)          | 4 (36%)                | 1 (10%)       | 1 (25%)                   |
| Missing                                                             | n/a              | n/a                    | 1 (10%)       | n/a                       |
| <b>Vasculitis severe; fibrinoid necrosis</b>                        |                  |                        |               |                           |
| Absent                                                              | 6 (60%)          | 3 (27%)                | 3 (30%)       | 1 (25%)                   |
| Mild                                                                | 3 (30%)          | 5 (46%)                | 5 (50%)       | 0                         |
| Moderate                                                            | 1 (10%)          | 1 (9%)                 | 1 (10%)       | 1 (25%)                   |
| Severe                                                              | 0                | 2 (18%)                | 0             | 2 (50%)                   |
| Missing                                                             | n/a              | n/a                    | 1 (10%)       | n/a                       |
| <b>Maternal thrombosis: occlusive</b>                               |                  |                        |               |                           |
| Not-present                                                         | 10 (100%)        | 8 (73%)                | 9 (90%)       | 2 (50%)                   |
| Present                                                             | 0                | 3 (27%)                | 0             | 2 (50%)                   |
| Missing                                                             | n/a              | n/a                    | 1 (10%)       | n/a                       |
| <b>Maternal; non-occlusive</b>                                      |                  |                        |               |                           |
| Absent                                                              | 8 (80%)          | 7 (64%)                | 9 (90%)       | 4 (100%)                  |
| Mild                                                                | 1 (10%)          | 4 (36%)                | 0             | 0                         |
| Moderate                                                            | 1 (10%)          | 0                      | 0             | 0                         |
| Severe                                                              | 0                | 0                      | 0             | 0                         |
| Missing                                                             | n/a              | n/a                    | 1 (10%)       | n/a                       |
| <b>Fetal occlusive</b>                                              |                  |                        |               |                           |
| Not-present                                                         | 10 (100%)        | 10 (91%)               | 9 (90%)       | 4 (100%)                  |
| Present                                                             | 0                | 1 (9%)                 | 0             | 0                         |
| Missing                                                             | n/a              | n/a                    | 1 (10%)       | n/a                       |
| <b>Fetal non-occlusive</b>                                          |                  |                        |               |                           |

|                                             |           |          |         |          |
|---------------------------------------------|-----------|----------|---------|----------|
| Not-present                                 | 9 (90%)   | 9 (82%)  | 8 (80%) | 4 (100%) |
| Present                                     | 1 (10%)   | 2 (18%)  | 1 (10%) | 0        |
| Missing                                     | n/a       | n/a      | 1 (10%) | n/a      |
| <b>Hemorrhage: Focal</b>                    |           |          |         |          |
| Not-present                                 | 10 (100%) | 7 (64%)  | 7 (70%) | 3 (75%)  |
| Present                                     | 0         | 4 (36%)  | 2 (20%) | 1 (25%)  |
| Missing                                     | n/a       | n/a      | 1 (10%) | n/a      |
| <b>Hemorrhage: Multifocal</b>               |           |          |         |          |
| Not-present                                 | 10 (100%) | 9 (82%)  | 8 (80%) | 2 (50%)  |
| Present                                     | 0         | 2 (18%)  | 1 (10%) | 2 (50%)  |
| Missing                                     | n/a       | n/a      | 1 (10%) | n/a      |
| <b>Hemorrhage: Acute</b>                    |           |          |         |          |
| Not-present                                 | 10 (100%) | 10 (91%) | 9 (90%) | 3 (75%)  |
| Present                                     | 0         | 1 (9%)   | 0       | 1 (25%)  |
| Missing                                     | n/a       | n/a      | 1 (10%) | n/a      |
| <b>Hemorrhage: Chronic; organized</b>       |           |          |         |          |
| Not-present                                 | 10 (100%) | 10 (91%) | 8 (80%) | 3 (75%)  |
| Present                                     | 0         | 1 (9%)   | 1 (10%) | 1 (25%)  |
| Missing                                     | n/a       | n/a      | 1 (10%) | n/a      |
| <b>Hemorrhage: Acute and chronic</b>        |           |          |         |          |
| Not-present                                 | 10 (100%) | 7 (64%)  | 6 (60%) | 2 (50%)  |
| Present                                     | 0         | 4 (36%)  | 3 (30%) | 2 (50%)  |
| Missing                                     | n/a       | n/a      | 1 (10%) | n/a      |
| <b>Infarct</b>                              |           |          |         |          |
| <b>Fetal: focal villous infarction</b>      |           |          |         |          |
| Not-present                                 | 10 (100%) | 8 (73%)  | 7 (70%) | 3 (75%)  |
| Present                                     | 0         | 3 (27%)  | 2 (20%) | 1 (25%)  |
| Missing                                     | n/a       | n/a      | 1 (10%) | n/a      |
| <b>Fetal: Multifocal villous infarction</b> |           |          |         |          |
| Not-present                                 | 10 (100%) | 9 (82%)  | 7 (70%) | 2 (50%)  |
| Present                                     | 0         | 2 (18%)  | 2 (20%) | 2 (50%)  |
| Missing                                     | n/a       | n/a      | 1 (10%) | n/a      |
| <b>Laminar decidual necrosis (&gt;10%)</b>  |           |          |         |          |
| Not-present                                 | 10 (100%) | 8 (73%)  | 7 (70%) | 3 (75%)  |
| Present                                     | 0         | 3 (27%)  | 2 (20%) | 1 (25%)  |
| Missing                                     | n/a       | n/a      | 1 (10%) | n/a      |
